# Supplementary material for: Key wheat GRF genes constraining wheat tillering of mutant dmc
Source: PeerJ. 2021 Apr 8;9:e11235. doi: 10.7717/peerj.11235 (PMC8038642; doi:10.7717/peerj.11235)
Supplement: Supplemental Information 2 [file peerj-09-11235-s002.xls]

## Sheet: Sheet1
Supplementary Table S4 List of primers used for TaGRF genes expression analysis
S/NO	Gene_name	Forward	Reverse
1	TaGRF1-6A	ATCTCCATCGCCAATGAACTC	CTTCGTTCTTGGTCTTCTCGTT
2	TaGRF1-6B	GCTTTGGTCGAGTGTAACATTT	CGGAAGCTAGCATCTCATCTAA
3	TaGRF1-6D	CCAGCTAGCTATCTTGACTCTC	AAATGTTACACTCGACCAAAGC
4	TaGRF2-6A	GGTAACAAGTCTTCCGGGAATA	CAATGTTGTCGTAGTTGAGGC
5	TaGRF2-7A	GTTCAAGAAAGCCTGTGGAAC	TTTATCTGGCTCTGAGAAGCAG
6	TaGRF2-7B	GGGTAGGCCCTGGAATATGG	ATTCATCGTTGTGGTGGTGGT
7	TaGRF2-7D	CTGTGGAACCGATGTCCTCCTC	GGTGGAGCTGGAGAGGGTTTAT
8	TaGRF3-2A	CATGACTCCAACCACAACAATG	CACCTTCACCGGGAGTATATAC
9	TaGRF3-2D	ATTCTGCCTATGGGTTTAGGAC	GGTAGCTCGAGAGTGAGAAC
10	TaGRF4-2B	ATTCTGCCTATGGGTTTAGGAC	GAGTGAGAAGGATGAGTTCTGG
11	TaGRF4-6A	CTTCTCAAACGACTACATTCCC	TTGTTGTTGCTGCTGTTGTTC
12	TaGRF4-6B	GTTCAAGAAAGCCTGTGGAAAC	TAGAGGGAGTGGTTGTGGAAG
13	TaGRF4-6D	GACCTCATTCCCGCTTTCAAG	CTGTTGTTGTGGTTGTTGTTCT
14	TaGRF5-4A	GCTTCACCATCGATTCCCCA	GCTGGTTCTCCTGCTTGACA
15	TaGRF5-7A	GTCATACGGCAACAAATACTCC	CTGTTGTTGTTTCCTGATGCTC
16	TaGRF5-7D	ATACGGCGGCAAATACTCCC	CAGTTGGTATGGGGTCAGGC
17	TaGRF6-4A	CCCGCTTCTTGCTTAGGGTT	CCCAATGTGGAGGAGCCAAA
18	TaGRF6-4B	CATTGATCCTTGTTCACTGCAA	GTGATTGTGATGCTCCTTTGAG
19	TaGRF6-4D	CAACAAACACCAACAGGACTC	GGAGGAAGCATCTCTATTCCTC
20	TaGRF9-4A	GTCCAATGAGCAGAGGCTGT	GGCCTCCAGGGCATTCTATC
21	TaGRF9-4D	ATGCCCTTCACTCCTTCACAG	TCTGCCGTTCTTTACCGC
22	TaGRF10-6A	GTCAGTTTGACAGTTACCGTTG	CTATGGAGGGAGAGTGTTCTTG
23	TaGRF10-6B	GAGCCTGTGCTTCGACTACC	CCACAGGCTTTCTTGAACGG
24	TaGRF10-6D	GAGCCTGTGCTTCGACTACC	CCACAGGCTTTCTTGAACGG
25	TaGRF11-2A	GAAGCCACAAAAACCCCTATTT	CACAATGCGACTTATCAGTGAG
26	TaGRF11-2B	AAAATGTCTTGTCGGAAGAAGC	CAATGCGACTTATCAATGAGGG
27	TaGRF11-2D	CACTTCAGGAAGAGATGAGAGC	CCAATCCCATCAATGTAGGGTA
28	TaGRF12-2A	GAGGTTTCCATCCCTGGCG	CCACTTCTTGCCGTCCGT
29	TaGRF12-2B	CTCCCCATCTGGAAGAGCGT	CACTTTTTGCCGTCCGTGC
30	TaGRF12-2D	TAGCTACAGATGTTTTGCTTGC	CGTGGTCAAGGCCAAAATAAAA
