# Supplementary material for: Key wheat GRF genes constraining wheat tillering of mutant dmc
Source: PeerJ. 2021 Apr 8;9:e11235. doi: 10.7717/peerj.11235 (PMC8038642; doi:10.7717/peerj.11235)
Supplement: Supplemental Information 3 [file peerj-09-11235-s003.xls]

## Sheet: Sheet 1
Supplementary Table S1 The expression levels of TaGRF genes in different tissues of Chinese Spring
Gene name	Gene ID	spike	grain	leaves/shoots	roots
TaGRF1-6A	TraesCS6A02G335900	1.23271	0	0	2.55886
TaGRF1-6B	TraesCS6B02G366700	1.79356	0	0	2.4932
TaGRF1-6D	TraesCS6D02G315700	1.77328	0	0	2.34567
TaGRF2-6A	TraesCS6A02G174800	0	0	0	0
TaGRF2-7A	TraesCS7A02G165600	0.732472	0	0	0
TaGRF2-7B	TraesCS7B02G070200	0.181935	0	0	0
TaGRF2-7D	TraesCS7D02G166400	0.0684208	0	0	0
TaGRF3-2A	TraesCS2A02G435100	0.715894	0	0	0
TaGRF3-2D	TraesCS2D02G435200	2.04352	0	1.06097	0
TaGRF4-2B	TraesCS2B02G458400	1.44067	0	0.722766	0
TaGRF4-6A	TraesCS6A02G269600	0	0	0	0
TaGRF4-6B	TraesCS6B02G296900	0.591261	0	0	0
TaGRF4-6D	TraesCS6D02G245300	0.558967	0	0	0
TaGRF5-4A	TraesCS4A02G434900	0.89301	0	0.36704	1.47583
TaGRF5-7A	TraesCS7A02G049100	1.33652	0	0.63828	2.21494
TaGRF5-7D	TraesCS7D02G044200	1.36453	0	0.842955	1.75962
TaGRF6-4A	TraesCS4A02G255000	2.16305	0.240568	0	2.77763
TaGRF6-4B	TraesCS4B02G060000	1.54824	0.827317	0	2.90729
TaGRF6-4D	TraesCS4D02G059600	1.50771	0.450034	0	2.94658
TaGRF9-4A	TraesCS4A02G291500	1.32647	0	0	0.814464
TaGRF9-4D	TraesCS4D02G020300	1.16189	0	0	0.946334
TaGRF10-6A	TraesCS6A02G257600	0	0	0	0
TaGRF10-6B	TraesCS6B02G267500	0	0	0	0.260664
TaGRF10-6D	TraesCS6D02G238900	0	0	0	0
TaGRF11-2A	TraesCS2A02G238700	3.85252	2.54661	3.19431	3.35537
TaGRF11-2B	TraesCS2B02G256600	3.64436	2.2787	2.76873	3.06159
TaGRF11-2D	TraesCS2D02G246600	3.44742	2.2753	2.34237	2.88351
TaGRF12-2A	TraesCS2A02G398300	0	0	0	0
TaGRF12-2B	TraesCS2B02G416300	0	0	0	0
TaGRF12-2D	TraesCS2D02G395900	0	0	0	0
Supplementary Table S1 The expression levels of TaGRF genes in different tissues of Azhurnaya
Gene name	Gene ID	spike	grain	leaves/shoots	roots
TaGRF1-6A	TraesCS6A02G335900	0	0	0	0.410847
TaGRF1-6B	TraesCS6B02G366700	0	0	0	0
TaGRF1-6D	TraesCS6D02G315700	0.44373	0	0	0.120627
TaGRF2-6A	TraesCS6A02G174800	0	0	0	0
TaGRF2-7A	TraesCS7A02G165600	0	0.250584	0	0
TaGRF2-7B	TraesCS7B02G070200	0	0	0	0
TaGRF2-7D	TraesCS7D02G166400	0	0	0	0
TaGRF3-2A	TraesCS2A02G435100	0	0	0	0
TaGRF3-2D	TraesCS2D02G435200	0.837201	0	0.586483	0
TaGRF4-2B	TraesCS2B02G458400	0.900834	0.0826625	0.244902	0
TaGRF4-6A	TraesCS6A02G269600	0	0	0	0
TaGRF4-6B	TraesCS6B02G296900	0	0	0	0
TaGRF4-6D	TraesCS6D02G245300	0	0	0	0
TaGRF5-4A	TraesCS4A02G434900	0.170292	0.496309	0.486804	0.466951
TaGRF5-7A	TraesCS7A02G049100	0.504249	0.58946	0.406204	1.11876
TaGRF5-7D	TraesCS7D02G044200	0.905329	1.13669	1.04239	1.06044
TaGRF6-4A	TraesCS4A02G255000	0.626835	1.58643	0	1.82352
TaGRF6-4B	TraesCS4B02G060000	0	1.82411	0	1.27096
TaGRF6-4D	TraesCS4D02G059600	0.123489	1.81116	0	1.45434
TaGRF9-4A	TraesCS4A02G291500	1.20188	1.00757	0.299361	1.07606
TaGRF9-4D	TraesCS4D02G020300	0.738227	0.68215	0.632375	1.51745
TaGRF10-6A	TraesCS6A02G257600	0	0	0	0
TaGRF10-6B	TraesCS6B02G267500	0	0	0	0
TaGRF10-6D	TraesCS6D02G238900	0	0	0	0
TaGRF11-2A	TraesCS2A02G238700	3.55425	2.80288	3.35627	3.52999
TaGRF11-2B	TraesCS2B02G256600	3.75249	3.25658	3.4376	3.91404
TaGRF11-2D	TraesCS2D02G246600	3.0131	2.70306	2.49965	3.06631
TaGRF12-2A	TraesCS2A02G398300	0	0	0	0
TaGRF12-2B	TraesCS2B02G416300	0	0	0	0
TaGRF12-2D	TraesCS2D02G395900	0	0	0	0
