# Supplementary material for: Key wheat GRF genes constraining wheat tillering of mutant dmc
Source: PeerJ. 2021 Apr 8;9:e11235. doi: 10.7717/peerj.11235 (PMC8038642; doi:10.7717/peerj.11235)
Supplement: Supplemental Information 4 [file peerj-09-11235-s004.xls]

## Sheet: Sheet1
Supplementary Table S2 GO annotation of TaGRF genes
Gene name	Gene ID	Molecular Function	Biological Process	Cellular Component
TaGRF1-6A	TraesCS6A02G335900	ATP binding (GO:0005524);hydrolase activity, acting on acid anhydrides, in phosphorus-containing anhydrides (GO:0016818)	regulation of transcription, DNA-templated (GO:0006355);response to gibberellin (GO:0009739);;response to deep water (GO:0030912);	nucleus (GO:0005634);
TaGRF1-6B	TraesCS6B02G366700	ATP binding (GO:0005524);hydrolase activity, acting on acid anhydrides, in phosphorus-containing anhydrides (GO:0016818);	regulation of transcription, DNA-templated (GO:0006355);response to gibberellin (GO:0009739);;response to deep water (GO:0030912);	nucleus (GO:0005634);
TaGRF1-6D	TraesCS6D02G315700	ATP binding (GO:0005524); hydrolase activity, acting on acid anhydrides, in phosphorus-containing anhydrides (GO:0016818);	regulation of transcription, DNA-templated (GO:0006355);response to gibberellin (GO:0009739);;response to deep water (GO:0030912);	nucleus (GO:0005634);
TaGRF2-6A	TraesCS6A02G174800		response to hormone (GO:0009725);post-embryonic development (GO:0009791); response to lipid (GO:0033993);leaf development (GO:0048366);regulation of cellular process (GO:0050794);response to alcohol (GO:0097305);	vacuole (GO:0005773);membrane (GO:0016020);
TaGRF2-7A	TraesCS7A02G165600	ATP binding (GO:0005524); hydrolase activity, acting on acid anhydrides, in phosphorus-containing anhydrides (GO:0016818);	regulation of transcription, DNA-templated (GO:0006355); response to gibberellin (GO:0009739); Biological Process: response to deep water (GO:0030912);	nucleus (GO:0005634);
TaGRF2-7B	TraesCS7B02G070200	ATP binding (GO:0005524); hydrolase activity, acting on acid anhydrides, in phosphorus-containing anhydrides (GO:0016818);	regulation of transcription, DNA-templated (GO:0006355); response to gibberellin (GO:0009739); Biological Process: response to deep water (GO:0030912);	nucleus (GO:0005634);
TaGRF2-7D	TraesCS7D02G166400		response to gibberellin (GO:0009739);response to deep water (GO:0030912);	nucleus (GO:0005634);
TaGRF3-2A	TraesCS2A02G435100	ATP binding (GO:0005524); hydrolase activity, acting on acid anhydrides, in phosphorus-containing anhydrides (GO:0016818);	regulation of transcription, DNA-templated (GO:0006355);	nucleus (GO:0005634); plastid (GO:0009536);
TaGRF3-2D	TraesCS2D02G435200	ATP binding (GO:0005524); hydrolase activity, acting on acid anhydrides, in phosphorus-containing anhydrides (GO:0016818);	regulation of transcription, DNA-templated (GO:0006355);	nucleus (GO:0005634); plastid (GO:0009536);
TaGRF4-2B	TraesCS2B02G458400	ATP binding (GO:0005524); hydrolase activity, acting on acid anhydrides, in phosphorus-containing anhydrides (GO:0016818);	regulation of transcription, DNA-templated (GO:0006355);	nucleus (GO:0005634); plastid (GO:0009536);
TaGRF4-6A	TraesCS6A02G269600	binding (GO:0005488);	transcription, DNA-templated (GO:0006351);	plastid (GO:0009536);
TaGRF4-6B	TraesCS6B02G296900	binding (GO:0005488);	transcription, DNA-templated (GO:0006351);	plastid (GO:0009536);
TaGRF4-6D	TraesCS6D02G245300	binding (GO:0005488);	transcription, DNA-templated (GO:0006351);	plastid (GO:0009536);
TaGRF5-4A	TraesCS4A02G434900	ATP binding (GO:0005524); hydrolase activity, acting on acid anhydrides, in phosphorus-containing anhydrides (GO:0016818);	regulation of transcription, DNA-templated (GO:0006355);	nucleus (GO:0005634);
TaGRF5-7A	TraesCS7A02G049100	ATP binding (GO:0005524); hydrolase activity, acting on acid anhydrides, in phosphorus-containing anhydrides (GO:0016818);	regulation of transcription, DNA-templated (GO:0006355);	nucleus (GO:0005634);
TaGRF5-7D	TraesCS7D02G044200	ATP binding (GO:0005524);hydrolase activity, acting on acid anhydrides, in phosphorus-containing anhydrides (GO:0016818);	regulation of transcription, DNA-templated (GO:0006355);;response to deep water (GO:0030912);	nucleus (GO:0005634);
TaGRF6-4A	TraesCS4A02G255000	ATP binding (GO:0005524); hydrolase activity, acting on acid anhydrides, in phosphorus-containing anhydrides (GO:0016818);	regulation of transcription, DNA-templated (GO:0006355);	nucleus (GO:0005634); plastid (GO:0009536);
TaGRF6-4B	TraesCS4B02G060000	ATP binding (GO:0005524); hydrolase activity, acting on acid anhydrides, in phosphorus-containing anhydrides (GO:0016818);	regulation of transcription, DNA-templated (GO:0006355);	nucleus (GO:0005634); plastid (GO:0009536);
TaGRF6-4D	TraesCS4D02G059600	ATP binding (GO:0005524);hydrolase activity, acting on acid anhydrides, in phosphorus-containing anhydrides (GO:0016818);	regulation of transcription, DNA-templated (GO:0006355);;response to deep water (GO:0030912);	nucleus (GO:0005634);plastid (GO:0009536);
TaGRF9-4A	TraesCS4A02G291500
TaGRF9-4D	TraesCS4D02G020300	ATP binding (GO:0005524); hydrolase activity, acting on acid anhydrides, in phosphorus-containing anhydrides (GO:0016818);	regulation of transcription, DNA-templated (GO:0006355);	nucleus (GO:0005634);
TaGRF10-6A	TraesCS6A02G257600	ATP binding (GO:0005524); hydrolase activity, acting on acid anhydrides, in phosphorus-containing anhydrides (GO:0016818);	regulation of transcription, DNA-templated (GO:0006355);	nucleus (GO:0005634); plastid (GO:0009536);
TaGRF10-6B	TraesCS6B02G267500	ATP binding (GO:0005524); hydrolase activity, acting on acid anhydrides, in phosphorus-containing anhydrides (GO:0016818);	regulation of transcription, DNA-templated (GO:0006355);	nucleus (GO:0005634); plastid (GO:0009536);
TaGRF10-6D	TraesCS6D02G238900	ATP binding (GO:0005524); hydrolase activity, acting on acid anhydrides, in phosphorus-containing anhydrides (GO:0016818);	regulation of transcription, DNA-templated (GO:0006355);	nucleus (GO:0005634); plastid (GO:0009536);
TaGRF11-2A	TraesCS2A02G238700	ATP binding (GO:0005524); hydrolase activity, acting on acid anhydrides, in phosphorus-containing anhydrides (GO:0016818);	regulation of transcription, DNA-templated (GO:0006355);	nucleus (GO:0005634); plastid (GO:0009536);
TaGRF11-2B	TraesCS2B02G256600	ATP binding (GO:0005524); hydrolase activity, acting on acid anhydrides, in phosphorus-containing anhydrides (GO:0016818);	regulation of transcription, DNA-templated (GO:0006355);	nucleus (GO:0005634); plastid (GO:0009536);
TaGRF11-2D	TraesCS2D02G246600	ATP binding (GO:0005524);hydrolase activity, acting on acid anhydrides, in phosphorus-containing anhydrides (GO:0016818);	regulation of transcription, DNA-templated (GO:0006355);response to deep water (GO:0030912);	nucleus (GO:0005634);
TaGRF12-2A	TraesCS2A02G398300	ATP binding (GO:0005524); hydrolase activity, acting on acid anhydrides, in phosphorus-containing anhydrides (GO:0016818);	regulation of transcription, DNA-templated (GO:0006355);	nucleus (GO:0005634); plastid (GO:0009536);
TaGRF12-2B	TraesCS2B02G416300		transcription, DNA-templated (GO:0006351);
TaGRF12-2D	TraesCS2D02G395900
