# Supplementary material for: Key wheat GRF genes constraining wheat tillering of mutant dmc
Source: PeerJ. 2021 Apr 8;9:e11235. doi: 10.7717/peerj.11235 (PMC8038642; doi:10.7717/peerj.11235)
Supplement: Supplemental Information 5 [file peerj-09-11235-s005.xls]

## Sheet: Sheet1
Supplementary Table S3 The expression levels of TaGRF genes in WT and dmc
Gene name	Gene ID	T01	T02	T03	T04	T05	T06
TaGRF1-6A	TraesCS6A02G335900	21.098	21.4846	18.1438	33.8632	26.483	28.221
TaGRF1-6B	TraesCS6B02G366700	9.80454	9.24952	6.71454	19.8297	16.3225	18.3299
TaGRF1-6D	TraesCS6D02G315700	-	-	-	-	-	-
TaGRF2-6A	TraesCS6A02G174800	9.09923	7.62744	6.18576	15.8573	12.2856	12.1042
TaGRF2-7A	TraesCS7A02G165600	13.8801	12.2698	10.6633	31.1413	27.5446	25.3486
TaGRF2-7B	TraesCS7B02G070200	6.37044	6.09273	6.66324	7.63548	7.3891	6.7286
TaGRF2-7D	TraesCS7D02G166400	19.7284	17.1355	17.0234	20.7613	16.2524	18.0061
TaGRF3-2A	TraesCS2A02G435100	15.7793	13.0538	11.6356	22.7346	19.2102	18.5413
TaGRF3-2D	TraesCS2D02G435200	8.34756	8.94551	8.09389	19.26	16.0366	14.7176
TaGRF4-2B	TraesCS2B02G458400	14.6405	12.6119	13.4461	20.5433	17.1969	15.2986
TaGRF4-6A	TraesCS6A02G269600	9.05463	9.3611	9.09778	21.0975	19.0667	20.575
TaGRF4-6B	TraesCS6B02G296900	10.4585	9.80917	9.62189	26.0849	22.5573	20.5679
TaGRF4-6D	TraesCS6D02G245300	5.36741	4.34996	4.0803	9.74261	8.27733	7.87755
TaGRF5-4A	TraesCS4A02G434900	7.52281	7.11079	7.58354	14.1042	12.6488	14.2413
TaGRF5-7A	TraesCS7A02G049100	-	-	-	-	-	-
TaGRF5-7D	TraesCS7D02G044200	7.06966	6.53957	6.8051	11.5093	11.9759	8.35143
TaGRF6-4A	TraesCS4A02G255000	4.86802	4.04711	2.73194	13.5471	11.1644	9.72659
TaGRF6-4B	TraesCS4B02G060000	8.87319	8.37745	7.00182	13.8604	11.3996	11.4295
TaGRF6-4D	TraesCS4D02G059600	9.60433	8.79451	7.65538	10.2601	8.56893	7.62073
TaGRF9-4A	TraesCS4A02G291500	17.7715	18.1507	15.6451	27.8254	23.9309	24.4368
TaGRF9-4D	TraesCS4D02G020300	6.85988	6.69264	6.39099	7.09297	7.43785	7.14459
TaGRF10-6A	TraesCS6A02G257600	7.93299	6.10727	8.24553	14.8699	12.6421	13.8013
TaGRF10-6B	TraesCS6B02G267500	3.64355	3.16511	3.42454	8.37368	6.2844	4.80985
TaGRF10-6D	TraesCS6D02G238900	0	0	0	0	0.0305089	0.0546608
TaGRF11-2A	TraesCS2A02G238700	25.9359	27.5711	20.5098	43.7578	35.5925	35.5991
TaGRF11-2B	TraesCS2B02G256600	8.47416	9.38043	8.38715	15.4483	12.8824	12.2721
TaGRF11-2D	TraesCS2D02G246600	3.67354	4.51517	3.34844	8.08741	7.04212	6.06113
TaGRF12-2A	TraesCS2A02G398300	1.87675	1.92069	1.66205	3.7673	3.5866	3.5708
TaGRF12-2B	TraesCS2B02G416300	6.92186	5.86432	6.34777	17.2342	15.1483	13.009
TaGRF12-2D	TraesCS2D02G395900	6.35139	5.74524	3.28828	12.3668	12.4419	10.2732
