# Supplementary material for: Key wheat GRF genes constraining wheat tillering of mutant dmc
Source: PeerJ. 2021 Apr 8;9:e11235. doi: 10.7717/peerj.11235 (PMC8038642; doi:10.7717/peerj.11235)
Supplement: Supplemental Information 6 [file peerj-09-11235-s006.xls]

## Sheet: Sheet 1
Supplementary Table S6 The numbers of syntenic gene pairs between wheat and Arabidopsis
Wheat chromosome	TaGRF gene ID	Arabidopsis chromosome	AtGRF gene ID
4B	TraesCS4B02G060000.1	2	AT2G22840.1
Supplementary Table S6 The numbers of syntenic gene pairs between wheat and rice
Wheat chromosome	TaGRF gene ID	Rice chromosome	OsGRF gene ID
2A	TraesCS2A02G398300.2	2	Os02t0678800-01
2A	TraesCS2A02G435100.1	4	Os04t0600900-02
2A	TraesCS2A02G398300.2	4	Os04t0574500-01
2B	TraesCS2B02G416300.1	2	Os02t0678800-01
2B	TraesCS2B02G458400.1	2	Os02t0701300-01
2B	TraesCS2B02G458400.1	4	Os04t0600900-02
2B	TraesCS2B02G416300.1	4	Os04t0574500-01
2D	TraesCS2D02G395900.1	2	Os02t0678800-01
2D	TraesCS2D02G435200.1	2	Os02t0701300-01
2D	TraesCS2D02G435200.1	4	Os04t0600900-02
2D	TraesCS2D02G395900.1	4	Os04t0574500-01
4A	TraesCS4A02G255000.1	3	Os03t0729500-01
4A	TraesCS4A02G291500.1	3	Os03t0674700-01
4A	TraesCS4A02G434900.1	6	Os06t0116200-01
4B	TraesCS4B02G060000.1	3	Os03t0729500-01
4D	TraesCS4D02G020300.1	3	Os03t0674700-01
6A	TraesCS6A02G257600.1	2	Os02t0678800-01
6A	TraesCS6A02G269600.1	2	Os02t0701300-01
6A	TraesCS6A02G335900.1	2	Os02t0776900-01
6A	TraesCS6A02G257600.1	4	Os04t0574500-01
6A	TraesCS6A02G269600.1	4	Os04t0600900-02
6A	TraesCS6A02G335900.1	6	Os06t0204800-00
6B	TraesCS6B02G296900.1	2	Os02t0701300-01
6B	TraesCS6B02G366700.1	2	Os02t0776900-01
6B	TraesCS6B02G267500.1	2	Os02t0678800-01
6B	TraesCS6B02G296900.1	4	Os04t0600900-02
6B	TraesCS6B02G267500.1	4	Os04t0574500-01
6D	TraesCS6D02G315700.1	2	Os02t0776900-01
6D	TraesCS6D02G238900.1	2	Os02t0678800-01
6D	TraesCS6D02G245300.1	2	Os02t0701300-01
6D	TraesCS6D02G238900.1	4	Os04t0574500-01
6D	TraesCS6D02G245300.1	4	Os04t0600900-02
7A	TraesCS7A02G165600.1	2	Os02t0776900-01
7A	TraesCS7A02G165600.1	6	Os06t0204800-00
7A	TraesCS7A02G049100.1	6	Os06t0116200-01
7B	TraesCS7B02G070200.1	2	Os02t0776900-01
7B	TraesCS7B02G070200.1	6	Os06t0204800-00
7D	TraesCS7D02G166400.1	2	Os02t0776900-01
7D	TraesCS7D02G166400.1	6	Os06t0204800-00
7D	TraesCS7D02G044200.1	6	Os06t0116200-01
Supplementary Table S6 The numbers of syntenic gene pairs between wheat and maize
Wheat chromosome	TaGRF gene ID	Maize chromosome	ZmGRF gene ID
2A	TraesCS2A02G435100.1	2	Zm00001d002429_T002
2A	TraesCS2A02G398300.2	4	Zm00001d051456_T001
2B	TraesCS2B02G458400.1	10	Zm00001d026240_T006
2B	TraesCS2B02G458400.1	2	Zm00001d002429_T002
2B	TraesCS2B02G256600.2	2	Zm00001d006348_T001
2B	TraesCS2B02G416300.1	4	Zm00001d051456_T001
2B	TraesCS2B02G458400.1	5	Zm00001d017742_T001
2D	TraesCS2D02G435200.1	10	Zm00001d026240_T006
2D	TraesCS2D02G435200.1	2	Zm00001d002429_T002
2D	TraesCS2D02G395900.1	4	Zm00001d051456_T001
2D	TraesCS2D02G435200.1	5	Zm00001d017742_T001
4A	TraesCS4A02G291500.1	1	Zm00001d033396_T002
4A	TraesCS4A02G255000.1	1	Zm00001d033876_T004
4A	TraesCS4A02G291500.1	5	Zm00001d013555_T001
4A	TraesCS4A02G434900.1	6	Zm00001d035965_T004
4A	TraesCS4A02G434900.1	9	Zm00001d045533_T001
4B	TraesCS4B02G060000.1	1	Zm00001d033876_T004
4B	TraesCS4B02G060000.1	5	Zm00001d013346_T001
4D	TraesCS4D02G020300.1	1	Zm00001d033396_T002
4D	TraesCS4D02G020300.1	5	Zm00001d013555_T001
4D	TraesCS4D02G059600.1	5	Zm00001d013346_T001
6A	TraesCS6A02G269600.1	10	Zm00001d026240_T006
6A	TraesCS6A02G269600.1	2	Zm00001d002429_T002
6A	TraesCS6A02G257600.1	4	Zm00001d051456_T001
6A	TraesCS6A02G335900.1	4	Zm00001d052112_T001
6A	TraesCS6A02G269600.1	5	Zm00001d017742_T001
6A	TraesCS6A02G335900.1	5	Zm00001d018260_T001
6B	TraesCS6B02G296900.1	10	Zm00001d026240_T006
6B	TraesCS6B02G296900.1	2	Zm00001d002429_T002
6B	TraesCS6B02G366700.1	4	Zm00001d052112_T001
6B	TraesCS6B02G267500.1	4	Zm00001d051456_T001
6B	TraesCS6B02G296900.1	5	Zm00001d017742_T001
6B	TraesCS6B02G366700.1	5	Zm00001d018260_T001
6D	TraesCS6D02G245300.1	10	Zm00001d026240_T006
6D	TraesCS6D02G245300.1	2	Zm00001d002429_T002
6D	TraesCS6D02G238900.1	4	Zm00001d051456_T001
6D	TraesCS6D02G315700.1	4	Zm00001d052112_T001
6D	TraesCS6D02G315700.1	5	Zm00001d018260_T001
6D	TraesCS6D02G245300.1	5	Zm00001d017742_T001
7A	TraesCS7A02G165600.1	4	Zm00001d052112_T001
7A	TraesCS7A02G165600.1	5	Zm00001d018260_T001
7A	TraesCS7A02G165600.1	6	Zm00001d037117_T001
7A	TraesCS7A02G049100.1	6	Zm00001d035965_T004
7A	TraesCS7A02G049100.1	9	Zm00001d045533_T001
7B	TraesCS7B02G070200.1	4	Zm00001d052112_T001
7B	TraesCS7B02G070200.1	5	Zm00001d018260_T001
7B	TraesCS7B02G070200.1	6	Zm00001d037117_T001
7D	TraesCS7D02G166400.1	4	Zm00001d052112_T001
7D	TraesCS7D02G166400.1	6	Zm00001d037117_T001
7D	TraesCS7D02G044200.1	6	Zm00001d035965_T004
7D	TraesCS7D02G044200.1	9	Zm00001d045533_T001
