# Supplementary material for: Key wheat GRF genes constraining wheat tillering of mutant dmc
Source: PeerJ. 2021 Apr 8;9:e11235. doi: 10.7717/peerj.11235 (PMC8038642; doi:10.7717/peerj.11235)
Supplement: Supplemental Information 7 [file peerj-09-11235-s007.xls]

## Sheet: Sheet1
Supplementary Table S5 The gene pairs of duplication of GRF genes in the wheat genome
Gene name	Gene ID	Gene name	Gene ID	duplication type
TaGRF11-2A	TraesCS2A02G238700.1	TaGRF11-2D	TraesCS2D02G246600.1	segmental duplication
TaGRF12-2A	TraesCS2A02G398300.2	TaGRF12-2B	TraesCS2B02G416300.1	segmental duplication
TaGRF12-2A	TraesCS2A02G398300.2	TaGRF12-2D	TraesCS2D02G395900.1	segmental duplication
TaGRF12-2A	TraesCS2A02G398300.2	TaGRF10-6A	TraesCS6A02G257600.1	segmental duplication
TaGRF12-2A	TraesCS2A02G398300.2	TaGRF10-6B	TraesCS6B02G267500.1	segmental duplication
TaGRF12-2A	TraesCS2A02G398300.2	TaGRF10-6D	TraesCS6D02G238900.1	segmental duplication
TaGRF12-2B	TraesCS2B02G416300.1	TaGRF12-2D	TraesCS2D02G395900.1	segmental duplication
TaGRF12-2B	TraesCS2B02G416300.1	TaGRF10-6A	TraesCS6A02G257600.1	segmental duplication
TaGRF12-2B	TraesCS2B02G416300.1	TaGRF10-6B	TraesCS6B02G267500.1	segmental duplication
TaGRF12-2B	TraesCS2B02G416300.1	TaGRF10-6D	TraesCS6D02G238900.1	segmental duplication
TaGRF4-2B	TraesCS2B02G458400.1	TaGRF3-2D	TraesCS2D02G435200.1	segmental duplication
TaGRF4-2B	TraesCS2B02G458400.1	TaGRF4-6A	TraesCS6A02G269600.1	segmental duplication
TaGRF4-2B	TraesCS2B02G458400.1	TaGRF4-6B	TraesCS6B02G296900.1	segmental duplication
TaGRF4-2B	TraesCS2B02G458400.1	TaGRF4-6D	TraesCS6D02G245300.1	segmental duplication
TaGRF12-2D	TraesCS2D02G395900.1	TaGRF10-6A	TraesCS6A02G257600.1	segmental duplication
TaGRF12-2D	TraesCS2D02G395900.1	TaGRF10-6B	TraesCS6B02G267500.1	segmental duplication
TaGRF3-2D	TraesCS2D02G435200.1	TaGRF4-6A	TraesCS6A02G269600.1	segmental duplication
TaGRF3-2D	TraesCS2D02G435200.1	TaGRF4-6B	TraesCS6B02G296900.1	segmental duplication
TaGRF6-4A	TraesCS4A02G255000.1	TaGRF6-4B	TraesCS4B02G060000.1	segmental duplication
TaGRF6-4A	TraesCS4A02G255000.1	TaGRF6-4D	TraesCS4D02G059600.1	segmental duplication
TaGRF9-4A	TraesCS4A02G291500.1	TaGRF9-4D	TraesCS4D02G020300.1	segmental duplication
TaGRF5-4A	TraesCS4A02G434900.1	TaGRF5-7A	TraesCS7A02G049100.1	segmental duplication
TaGRF5-4A	TraesCS4A02G434900.1	TaGRF5-7D	TraesCS7D02G044200.1	segmental duplication
TaGRF6-4B	TraesCS4B02G060000.1	TaGRF6-4D	TraesCS4D02G059600.1	segmental duplication
TaGRF10-6A	TraesCS6A02G257600.1	TaGRF10-6D	TraesCS6D02G238900.1	segmental duplication
TaGRF10-6A	TraesCS6A02G257600.1	TaGRF10-6B	TraesCS6B02G267500.1	segmental duplication
TaGRF4-6A	TraesCS6A02G269600.1	TaGRF4-6B	TraesCS6B02G296900.1	segmental duplication
TaGRF4-6A	TraesCS6A02G269600.1	TaGRF4-6D	TraesCS6D02G245300.1	segmental duplication
TaGRF1-6A	TraesCS6A02G335900.1	TaGRF1-6B	TraesCS6B02G366700.1	segmental duplication
TaGRF1-6A	TraesCS6A02G335900.1	TaGRF1-6D	TraesCS6D02G315700.1	segmental duplication
TaGRF1-6A	TraesCS6A02G335900.1	TaGRF2-7B	TraesCS7B02G070200.1	segmental duplication
TaGRF10-6B	TraesCS6B02G267500.1	TaGRF10-6D	TraesCS6D02G238900.1	segmental duplication
TaGRF4-6B	TraesCS6B02G296900.1	TaGRF4-6D	TraesCS6D02G245300.1	segmental duplication
TaGRF1-6B	TraesCS6B02G366700.1	TaGRF1-6D	TraesCS6D02G315700.1	segmental duplication
TaGRF1-6B	TraesCS6B02G366700.1	TaGRF2-7B	TraesCS7B02G070200.1	segmental duplication
TaGRF5-7A	TraesCS7A02G049100.1	TaGRF5-7D	TraesCS7D02G044200.1	segmental duplication
TaGRF2-7A	TraesCS7A02G165600.1	TaGRF2-7B	TraesCS7B02G070200.1	segmental duplication
TaGRF2-7A	TraesCS7A02G165600.1	TaGRF2-7D	TraesCS7D02G166400.1	segmental duplication
TaGRF2-7B	TraesCS7B02G070200.1	TaGRF2-7D	TraesCS7D02G166400.1	segmental duplication
