# Supplementary material for: Key wheat GRF genes constraining wheat tillering of mutant dmc
Source: PeerJ. 2021 Apr 8;9:e11235. doi: 10.7717/peerj.11235 (PMC8038642; doi:10.7717/peerj.11235)
Supplement: Supplemental Information 8 [file peerj-09-11235-s008.xls]

## Sheet: Sheet 1
Supplementary Table S7 One-to-one orthologous relationships between wheat and wheat
TaGRF gene ID	Wheat chromosome	TaGRF gene ID	Wheat chromosome	Ka	Ks	Ka/Ks	Selection pressure
TraesCS2A02G238700.1	2A	TraesCS2D02G246600.1	2D	0.0116978	0.038	0.307836	Purifying selection
TraesCS2A02G398300.2	2A	TraesCS2B02G416300.1	2B	0.0121913	0.0889491	0.137059	Purifying selection
TraesCS2A02G398300.2	2A	TraesCS2D02G395900.1	2D	0.0101576	0.0639613	0.158809	Purifying selection
TraesCS2A02G398300.2	2A	TraesCS6A02G257600.1	6A	0.213803	0.406419	0.526066	Purifying selection
TraesCS2A02G398300.2	2A	TraesCS6B02G267500.1	6B	0.216626	0.404301	0.535802	Purifying selection
TraesCS2A02G398300.2	2A	TraesCS6D02G238900.1	6D	0.233009	0.46954	0.496249	Purifying selection
TraesCS2B02G416300.1	2B	TraesCS2D02G395900.1	2D	0.00601909	0.0818329	0.0735534	Purifying selection
TraesCS2B02G416300.1	2B	TraesCS6A02G257600.1	6A	0.207893	0.406198	0.511802	Purifying selection
TraesCS2B02G416300.1	2B	TraesCS6B02G267500.1	6B	0.21269	0.387064	0.549497	Purifying selection
TraesCS2B02G416300.1	2B	TraesCS6D02G238900.1	6D	0.223197	0.439944	0.50733	Purifying selection
TraesCS2B02G458400.1	2B	TraesCS2D02G435200.1	2D	0.0281036	0.0545861	0.514849	Purifying selection
TraesCS2B02G458400.1	2B	TraesCS6A02G269600.1	6A	0.23278	0.445885	0.522063	Purifying selection
TraesCS2B02G458400.1	2B	TraesCS6B02G296900.1	6B	0.220534	0.449578	0.490535	Purifying selection
TraesCS2B02G458400.1	2B	TraesCS6D02G245300.1	6D	0.221082	0.444809	0.497028	Purifying selection
TraesCS2D02G395900.1	2D	TraesCS6A02G257600.1	6A	0.212591	0.368911	0.576265	Purifying selection
TraesCS2D02G395900.1	2D	TraesCS6B02G267500.1	6B	0.215428	0.376972	0.571469	Purifying selection
TraesCS2D02G435200.1	2D	TraesCS6A02G269600.1	6A	0.233889	0.435719	0.536789	Purifying selection
TraesCS2D02G435200.1	2D	TraesCS6B02G296900.1	6B	0.239793	0.47755	0.502131	Purifying selection
TraesCS4A02G255000.1	4A	TraesCS4B02G060000.1	4B	0.011197	0.097062	0.11536	Purifying selection
TraesCS4A02G255000.1	4A	TraesCS4D02G059600.1	4D	0.0139738	0.0802059	0.174224	Purifying selection
TraesCS4A02G291500.1	4A	TraesCS4D02G020300.1	4D	0.00854786	0.0736788	0.116015	Purifying selection
TraesCS4A02G434900.1	4A	TraesCS7A02G049100.1	7A	0.0133919	0.102152	0.131098	Purifying selection
TraesCS4A02G434900.1	4A	TraesCS7D02G044200.1	7D	0.0109203	0.0890794	0.122591	Purifying selection
TraesCS4B02G060000.1	4B	TraesCS4D02G059600.1	4D	0.0108417	0.0777394	0.139462	Purifying selection
TraesCS6A02G257600.1	6A	TraesCS6D02G238900.1	6D	0.0216114	0.0432441	0.499755	Purifying selection
TraesCS6A02G269600.1	6A	TraesCS6B02G296900.1	6B	0.0236751	0.0905183	0.26155	Purifying selection
TraesCS6A02G269600.1	6A	TraesCS6D02G245300.1	6D	0.0331111	0.0734584	0.450747	Purifying selection
TraesCS6A02G335900.1	6A	TraesCS6B02G366700.1	6B	0.00433762	0.0895517	0.0484371	Purifying selection
TraesCS6A02G335900.1	6A	TraesCS6D02G315700.1	6D	0.0032287	0.085859	0.0376047	Purifying selection
TraesCS6A02G335900.1	6A	TraesCS7B02G070200.1	7B	0.317712	0.425939	0.74591	Purifying selection
TraesCS6B02G267500.1	6B	TraesCS6D02G238900.1	6D	0.019538	0.0497076	0.393059	Purifying selection
TraesCS6B02G296900.1	6B	TraesCS6D02G245300.1	6D	0.0134332	0.0651094	0.206317	Purifying selection
TraesCS6B02G366700.1	6B	TraesCS6D02G315700.1	6D	0.00538602	0.0739167	0.072866	Purifying selection
TraesCS6B02G366700.1	6B	TraesCS7B02G070200.1	7B	0.330954	0.390697	0.847086	Purifying selection
TraesCS7A02G049100.1	7A	TraesCS7D02G044200.1	7D	0.0084858	0.0574077	0.147816	Purifying selection
TraesCS7A02G165600.1	7A	TraesCS7B02G070200.1	7B	0.0148116	0.0396277	0.37377	Purifying selection
TraesCS7A02G165600.1	7A	TraesCS7D02G166400.1	7D	0.0220496	0.02143	1.02891	Purifying selection
TraesCS7B02G070200.1	7B	TraesCS7D02G166400.1	7D	0.0129283	0.0428995	0.301362	Purifying selection
Supplementary Table S7 One-to-one orthologous relationships between wheat and Arabidopsis
TaGRF gene ID	Wheat chromosome	AtGRF gene ID	Arabidopsis chromosome	Ka	Ks	Ka/Ks	Selection pressure
TraesCS4B02G060000.1	4B	AT2G22840.1	2	0.64065	NaN	NaN	Purifying selection
Supplementary Table S7 One-to-one orthologous relationships between wheat and rice
TaGRF gene ID	Wheat chromosome	OsGRF gene ID	Rice chromosome	Ka	Ks	Ka/Ks	Selection pressure
TraesCS2A02G398300.2	2A	Os02t0678800-01	2	0.195	0.381848	0.510675	Purifying selection
TraesCS2A02G435100.1	2A	Os04t0600900-02	4	0.14694	0.452669	0.324609	Purifying selection
TraesCS2A02G398300.2	2A	Os04t0574500-01	4	0.153081	0.368875	0.414995	Purifying selection
TraesCS2B02G416300.1	2B	Os02t0678800-01	2	0.192312	0.43326	0.443871	Purifying selection
TraesCS2B02G458400.1	2B	Os02t0701300-01	2	0.231636	0.821306	0.282033	Purifying selection
TraesCS2B02G458400.1	2B	Os04t0600900-02	4	0.145963	0.434629	0.335833	Purifying selection
TraesCS2B02G416300.1	2B	Os04t0574500-01	4	0.151864	0.382413	0.39712	Purifying selection
TraesCS2D02G395900.1	2D	Os02t0678800-01	2	0.191169	0.394336	0.484787	Purifying selection
TraesCS2D02G435200.1	2D	Os02t0701300-01	2	0.239968	0.833197	0.288009	Purifying selection
TraesCS2D02G435200.1	2D	Os04t0600900-02	4	0.160321	0.423739	0.378349	Purifying selection
TraesCS2D02G395900.1	2D	Os04t0574500-01	4	0.152186	0.352362	0.431902	Purifying selection
TraesCS4A02G255000.1	4A	Os03t0729500-01	3	0.111136	1.26981	0.0875219	Purifying selection
TraesCS4A02G291500.1	4A	Os03t0674700-01	3	0.146994	0.727194	0.202139	Purifying selection
TraesCS4A02G434900.1	4A	Os06t0116200-01	6	0.0921804	0.437231	0.210828	Purifying selection
TraesCS4B02G060000.1	4B	Os03t0729500-01	3	0.10521	1.20145	0.0875688	Purifying selection
TraesCS4D02G020300.1	4D	Os03t0674700-01	3	0.154409	0.775744	0.199046	Purifying selection
TraesCS6A02G257600.1	6A	Os02t0678800-01	2	0.143686	0.284341	0.505331	Purifying selection
TraesCS6A02G269600.1	6A	Os02t0701300-01	2	0.131982	0.723061	0.182533	Purifying selection
TraesCS6A02G335900.1	6A	Os02t0776900-01	2	0.125073	0.312168	0.40066	Purifying selection
TraesCS6A02G257600.1	6A	Os04t0574500-01	4	0.225782	0.375526	0.601241	Purifying selection
TraesCS6A02G269600.1	6A	Os04t0600900-02	4	0.212167	0.619947	0.342234	Purifying selection
TraesCS6A02G335900.1	6A	Os06t0204800-00	6	0.298883	0.338529	0.882886	Purifying selection
TraesCS6B02G296900.1	6B	Os02t0701300-01	2	0.130146	0.705629	0.184439	Purifying selection
TraesCS6B02G366700.1	6B	Os02t0776900-01	2	0.125139	0.311997	0.401091	Purifying selection
TraesCS6B02G267500.1	6B	Os02t0678800-01	2	0.125742	0.27786	0.452536	Purifying selection
TraesCS6B02G296900.1	6B	Os04t0600900-02	4	0.188272	0.621043	0.303154	Purifying selection
TraesCS6B02G267500.1	6B	Os04t0574500-01	4	0.19546	0.480704	0.406613	Purifying selection
TraesCS6D02G315700.1	6D	Os02t0776900-01	2	0.127684	0.324244	0.39379	Purifying selection
TraesCS6D02G238900.1	6D	Os02t0678800-01	2	0.133367	0.271027	0.492079	Purifying selection
TraesCS6D02G245300.1	6D	Os02t0701300-01	2	0.134122	0.745153	0.179993	Purifying selection
TraesCS6D02G238900.1	6D	Os04t0574500-01	4	0.211918	0.464348	0.456377	Purifying selection
TraesCS6D02G245300.1	6D	Os04t0600900-02	4	0.207066	0.624748	0.331439	Purifying selection
TraesCS7A02G165600.1	7A	Os02t0776900-01	2	0.352559	0.440618	0.800146	Purifying selection
TraesCS7A02G165600.1	7A	Os06t0204800-00	6	0.246168	0.301931	0.81531	Purifying selection
TraesCS7A02G049100.1	7A	Os06t0116200-01	6	0.0833242	0.460601	0.180903	Purifying selection
TraesCS7B02G070200.1	7B	Os02t0776900-01	2	0.346006	0.458297	0.754982	Purifying selection
TraesCS7B02G070200.1	7B	Os06t0204800-00	6	0.235863	0.323317	0.72951	Purifying selection
TraesCS7D02G166400.1	7D	Os02t0776900-01	2	0.356576	0.488953	0.729264	Purifying selection
TraesCS7D02G166400.1	7D	Os06t0204800-00	6	0.203102	0.300436	0.676027	Purifying selection
TraesCS7D02G044200.1	7D	Os06t0116200-01	6	0.084838	0.452181	0.18762	Purifying selection
Supplementary Table S7 One-to-one orthologous relationships between wheat and maize
TaGRF gene ID	Wheat chromosome	ZmGRF gene ID	Maize chromosome	Ka	Ks	Ka/Ks	Selection pressure
TraesCS2A02G435100.1	2A	Zm00001d002429_T002	2	0.203696	0.406452	0.501157	Purifying selection
TraesCS2A02G398300.2	2A	Zm00001d051456_T001	4	0.175687	0.363654	0.483116	Purifying selection
TraesCS2B02G458400.1	2B	Zm00001d026240_T006	10	0.193718	0.39577	0.48947	Purifying selection
TraesCS2B02G458400.1	2B	Zm00001d002429_T002	2	0.19276	0.435465	0.442653	Purifying selection
TraesCS2B02G256600.2	2B	Zm00001d006348_T001	2	0.137382	0.715018	0.192138	Purifying selection
TraesCS2B02G416300.1	2B	Zm00001d051456_T001	4	0.173142	0.400786	0.432007	Purifying selection
TraesCS2B02G458400.1	2B	Zm00001d017742_T001	5	0.263899	0.517649	0.509804	Purifying selection
TraesCS2D02G435200.1	2D	Zm00001d026240_T006	10	0.185052	0.365077	0.506883	Purifying selection
TraesCS2D02G435200.1	2D	Zm00001d002429_T002	2	0.178976	0.407007	0.439736	Purifying selection
TraesCS2D02G395900.1	2D	Zm00001d051456_T001	4	0.169335	0.366062	0.462585	Purifying selection
TraesCS2D02G435200.1	2D	Zm00001d017742_T001	5	0.268334	0.48859	0.5492	Purifying selection
TraesCS4A02G291500.1	4A	Zm00001d033396_T002	1	0.222852	0.776486	0.287001	Purifying selection
TraesCS4A02G255000.1	4A	Zm00001d033876_T004	1	0.165971	0.64461	0.257475	Purifying selection
TraesCS4A02G291500.1	4A	Zm00001d013555_T001	5	0.227628	0.834601	0.272739	Purifying selection
TraesCS4A02G434900.1	4A	Zm00001d035965_T004	6	0.141193	0.53592	0.263459	Purifying selection
TraesCS4A02G434900.1	4A	Zm00001d045533_T001	9	0.185487	0.485765	0.381845	Purifying selection
TraesCS4B02G060000.1	4B	Zm00001d033876_T004	1	0.156256	0.621065	0.251594	Purifying selection
TraesCS4B02G060000.1	4B	Zm00001d013346_T001	5	0.206749	0.611719	0.33798	Purifying selection
TraesCS4D02G020300.1	4D	Zm00001d033396_T002	1	0.221038	0.754111	0.293111	Purifying selection
TraesCS4D02G020300.1	4D	Zm00001d013555_T001	5	0.22806	0.809112	0.281865	Purifying selection
TraesCS4D02G059600.1	4D	Zm00001d013346_T001	5	0.219993	0.624019	0.352542	Purifying selection
TraesCS6A02G269600.1	6A	Zm00001d026240_T006	10	0.255571	0.530777	0.481503	Purifying selection
TraesCS6A02G269600.1	6A	Zm00001d002429_T002	2	0.298919	0.58136	0.514173	Purifying selection
TraesCS6A02G257600.1	6A	Zm00001d051456_T001	4	0.155875	0.294865	0.528634	Purifying selection
TraesCS6A02G335900.1	6A	Zm00001d052112_T001	4	0.178998	0.404053	0.443007	Purifying selection
TraesCS6A02G269600.1	6A	Zm00001d017742_T001	5	0.195177	0.396892	0.491763	Purifying selection
TraesCS6A02G335900.1	6A	Zm00001d018260_T001	5	0.208722	0.371226	0.562251	Purifying selection
TraesCS6B02G296900.1	6B	Zm00001d026240_T006	10	0.25702	0.540747	0.475306	Purifying selection
TraesCS6B02G296900.1	6B	Zm00001d002429_T002	2	0.294487	0.591438	0.497917	Purifying selection
TraesCS6B02G366700.1	6B	Zm00001d052112_T001	4	0.193583	0.359542	0.538417	Purifying selection
TraesCS6B02G267500.1	6B	Zm00001d051456_T001	4	0.153835	0.323741	0.475179	Purifying selection
TraesCS6B02G296900.1	6B	Zm00001d017742_T001	5	0.186493	0.379562	0.491337	Purifying selection
TraesCS6B02G366700.1	6B	Zm00001d018260_T001	5	0.21219	0.322598	0.657755	Purifying selection
TraesCS6D02G245300.1	6D	Zm00001d026240_T006	10	0.270043	0.545093	0.495408	Purifying selection
TraesCS6D02G245300.1	6D	Zm00001d002429_T002	2	0.292388	0.586322	0.498682	Purifying selection
TraesCS6D02G238900.1	6D	Zm00001d051456_T001	4	0.15077	0.325489	0.46321	Purifying selection
TraesCS6D02G315700.1	6D	Zm00001d052112_T001	4	0.191871	0.408656	0.469516	Purifying selection
TraesCS6D02G315700.1	6D	Zm00001d018260_T001	5	0.212535	0.357356	0.594742	Purifying selection
TraesCS6D02G245300.1	6D	Zm00001d017742_T001	5	0.190747	0.423815	0.450072	Purifying selection
TraesCS7A02G165600.1	7A	Zm00001d052112_T001	4	0.375148	0.40694	0.921877	Purifying selection
TraesCS7A02G165600.1	7A	Zm00001d018260_T001	5	0.409804	0.437741	0.93618	Purifying selection
TraesCS7A02G165600.1	7A	Zm00001d037117_T001	6	0.299304	0.427015	0.700922	Purifying selection
TraesCS7A02G049100.1	7A	Zm00001d035965_T004	6	0.143309	0.510896	0.280505	Purifying selection
TraesCS7A02G049100.1	7A	Zm00001d045533_T001	9	0.163215	0.456919	0.357207	Purifying selection
TraesCS7B02G070200.1	7B	Zm00001d052112_T001	4	0.347914	0.457786	0.759993	Purifying selection
TraesCS7B02G070200.1	7B	Zm00001d018260_T001	5	0.38568	0.53504	0.720843	Purifying selection
TraesCS7B02G070200.1	7B	Zm00001d037117_T001	6	0.310983	0.454362	0.68444	Purifying selection
TraesCS7D02G166400.1	7D	Zm00001d052112_T001	4	0.365534	0.466845	0.782988	Purifying selection
TraesCS7D02G166400.1	7D	Zm00001d037117_T001	6	0.308813	0.428181	0.72122	Purifying selection
TraesCS7D02G044200.1	7D	Zm00001d035965_T004	6	0.134818	0.528169	0.255255	Purifying selection
TraesCS7D02G044200.1	7D	Zm00001d045533_T001	9	0.182262	0.459137	0.396967	Purifying selection
