# Supplementary material for: Key wheat GRF genes constraining wheat tillering of mutant dmc
Source: PeerJ journal article supplement (doi:10.7717/peerj.11235), 2021-04-08
Supplement: supplementary_file_1.zip [file supplementary_file_1.zip]

## Sheet: 0
	Well	Fluor	Target	Content	Sample	Biological Set Name	Cq	Cq Mean	Cq Std. Dev	Starting Quantity (SQ)	Log Starting Quantity	SQ Mean	SQ Std. Dev	Set Point	Well Note
	A01	SYBR	GAPDH	Unkn-01	WT1		24.191	24.3596	0.169046
	A02	SYBR	GAPDH	Unkn-01	WT1		24.3587	24.3596	0.169046
	A03	SYBR	GAPDH	Unkn-01	WT1		24.5291	24.3596	0.169046
	A04	SYBR	GAPDH	Unkn-02	DMC1		23.7663	23.8099	0.25383
	A05	SYBR	GAPDH	Unkn-02	DMC1		24.0827	23.8099	0.25383
	A06	SYBR	GAPDH	Unkn-02	DMC1		23.5807	23.8099	0.25383
	A07	SYBR	GRF37	Unkn-03	WT1		36.4882	36.2154	0.256906
	A08	SYBR	GRF37	Unkn-03	WT1		35.9781	36.2154	0.256906
	A09	SYBR	GRF37	Unkn-03	WT1		36.1799	36.2154	0.256906
	A10	SYBR	GRF37	Unkn-04	DMC1		36.2711	36.0991	0.15547
	A11	SYBR	GRF37	Unkn-04	DMC1		36.0574	36.0991	0.15547
	A12	SYBR	GRF37	Unkn-04	DMC1		35.9687	36.0991	0.15547
	B01	SYBR	GRF2	Unkn-05	WT1		28.7366	28.6415	0.378419					60
	B02	SYBR	GRF2	Unkn-05	WT1		28.9633	28.6415	0.378419					60
	B03	SYBR	GRF2	Unkn-05	WT1		28.2246	28.6415	0.378419					60
	B04	SYBR	GRF2	Unkn-06	DMC1		29.1813	29.2689	0.0790223					60
	B05	SYBR	GRF2	Unkn-06	DMC1		29.3348	29.2689	0.0790223					60
	B06	SYBR	GRF2	Unkn-06	DMC1		29.2907	29.2689	0.0790223					60
	B07	SYBR	GAPDH	Unkn-07	WT2		23.1546	23.1285	0.0228097					60
	B08	SYBR	GAPDH	Unkn-07	WT2		23.1124	23.1285	0.0228097					60
	B09	SYBR	GAPDH	Unkn-07	WT2		23.1184	23.1285	0.0228097					60
	B10	SYBR	GAPDH	Unkn-08	DMC2		23.7859	23.7928	0.0174732					60
	B11	SYBR	GAPDH	Unkn-08	DMC2		23.8127	23.7928	0.0174732					60
	B12	SYBR	GAPDH	Unkn-08	DMC2		23.7799	23.7928	0.0174732					60
	C01	SYBR	GRF37	Unkn-09	WT2		37.1377	37.5671	0.398548					60
	C02	SYBR	GRF37	Unkn-09	WT2		37.9252	37.5671	0.398548					60
	C03	SYBR	GRF37	Unkn-09	WT2		37.6385	37.5671	0.398548					60
	C04	SYBR	GRF37	Unkn-10	DMC2		38.2161	38.0895	0.148436					60
	C05	SYBR	GRF37	Unkn-10	DMC2		37.9261	38.0895	0.148436					60
	C06	SYBR	GRF37	Unkn-10	DMC2		38.1261	38.0895	0.148436					60
	C07	SYBR	GRF2	Unkn-11	WT2		29.0408	29.1341	0.166893					60
	C08	SYBR	GRF2	Unkn-11	WT2		29.3267	29.1341	0.166893					60
	C09	SYBR	GRF2	Unkn-11	WT2		29.0347	29.1341	0.166893					60
	C10	SYBR	GRF2	Unkn-12	DMC2		29.9397	29.873	0.101691					60
	C11	SYBR	GRF2	Unkn-12	DMC2		29.756	29.873	0.101691					60
	C12	SYBR	GRF2	Unkn-12	DMC2		29.9233	29.873	0.101691					60
	D01	SYBR	GAPDH	Unkn-13	WT3		19.9966	20.245	0.298957					60
	D02	SYBR	GAPDH	Unkn-13	WT3		20.1616	20.245	0.298957					60
	D03	SYBR	GAPDH	Unkn-13	WT3		20.5768	20.245	0.298957					60
	D04	SYBR	GAPDH	Unkn-14	DMC3		22.3444	22.4961	0.169575					60
	D05	SYBR	GAPDH	Unkn-14	DMC3		22.6792	22.4961	0.169575					60
	D06	SYBR	GAPDH	Unkn-14	DMC3		22.4646	22.4961	0.169575					60
	D07	SYBR	GRF37	Unkn-15	WT3		37.4307	37.3241	0.16233					60
	D08	SYBR	GRF37	Unkn-15	WT3		37.4044	37.3241	0.16233					60
	D09	SYBR	GRF37	Unkn-15	WT3		37.1373	37.3241	0.16233					60
	D10	SYBR	GRF37	Unkn-16	DMC3		38.0437	37.697	0.427387					60
	D11	SYBR	GRF37	Unkn-16	DMC3		37.8277	37.697	0.427387					60
	D12	SYBR	GRF37	Unkn-16	DMC3		37.2195	37.697	0.427387					60
	E01	SYBR	GRF2	Unkn-17	WT3		30.3734	30.4079	0.0878174					60
	E02	SYBR	GRF2	Unkn-17	WT3		30.5078	30.4079	0.0878174					60
	E03	SYBR	GRF2	Unkn-17	WT3		30.3427	30.4079	0.0878174					60
	E04	SYBR	GRF2	Unkn-18	DMC3		30.6666	30.5565	0.0965174					60
	E05	SYBR	GRF2	Unkn-18	DMC3		30.516	30.5565	0.0965174					60
	E06	SYBR	GRF2	Unkn-18	DMC3		30.4868	30.5565	0.0965174					60
														60
														60
														60
														60
														60
														60
														60
														60
														60
														60
														60
														60
														60
														60
														60
														60
														60
														60
														60
														60
														60
														60
														60
														60
														60
														60
														60
														60
														60
														60
														60
														60
														60
														60
														60
														60
